# Supplementary material
Source: publisher figshare collection journal article supplement (https://f1000.figshare.com/ndownloader/files/232648)
Supplement: Supplementary file 1 [file 232648]

F15H11ext
Well	Fluor	Contente	Target	Sample	Threshold cycle C(t)	C(t) Mean	C(t) Std Dev	Starting Quantity (SQ)	Log Starting Quantity	SQ Mean	SQ Std Dev.	60.0
H01	SYBR	NTC	F15H11ext		39.01	39.01	0.000	N/A	N/A	N/A	0.00000	60.0
H02	SYBR	NTC	F15H11ext		N/A	0.00	0.000	N/A	N/A	0.00000	0.00000	60.0
A01	SYBR	Std	F15H11ext		10.57	10.57	0.000	0.00000	-10.301	0.00000	0.00000	60.0
A02	SYBR	Std	F15H11ext		10.55	10.55	0.000	0.00000	-10.301	0.00000	0.00000	60.0
B01	SYBR	Std	F15H11ext		16.40	16.40	0.000	0.00000	-11.301	0.00000	0.00000	60.0
B02	SYBR	Std	F15H11ext		16.24	16.24	0.000	0.00000	-11.301	0.00000	0.00000	60.0
C01	SYBR	Std	F15H11ext		18.29	18.29	0.000	0.00000	-12.301	0.00000	0.00000	60.0
C02	SYBR	Std	F15H11ext		19.09	19.09	0.000	0.00000	-12.301	0.00000	0.00000	60.0
D01	SYBR	Std	F15H11ext		23.04	23.04	0.000	0.00000	-13.301	0.00000	0.00000	60.0
D02	SYBR	Std	F15H11ext		23.03	23.03	0.000	0.00000	-13.301	0.00000	0.00000	60.0
E01	SYBR	Std	F15H11ext		25.02	25.02	0.000	0.00000	-14.301	0.00000	0.00000	60.0
E02	SYBR	Std	F15H11ext		24.82	24.82	0.000	0.00000	-14.301	0.00000	0.00000	60.0
F01	SYBR	Std	F15H11ext		29.74	29.74	0.000	0.00000	-15.301	0.00000	0.00000	60.0
F02	SYBR	Std	F15H11ext		29.74	29.74	0.000	0.00000	-15.301	0.00000	0.00000	60.0
G01	SYBR	Std	F15H11ext		35.10	35.10	0.000	0.00000	-16.301	0.00000	0.00000	60.0
G02	SYBR	Std	F15H11ext		35.06	35.06	0.000	0.00000	-16.301	0.00000	0.00000	60.0
B03	SYBR	Unkn-02	F15H11ext	53-4	19.64	19.72	0.167	0.00000	-12.519	0.00000	0.00000	60.0
B04	SYBR	Unkn-02	F15H11ext	53-4	19.60	19.72	0.167	0.00000	-12.507	0.00000	0.00000	60.0
B05	SYBR	Unkn-02	F15H11ext	53-4	19.91	19.72	0.167	0.00000	-12.589	0.00000	0.00000	60.0
C03	SYBR	Unkn-03	F15H11ext	53-5	20.26	20.31	0.047	0.00000	-12.680	0.00000	0.00000	60.0
C04	SYBR	Unkn-03	F15H11ext	53-5	20.33	20.31	0.047	0.00000	-12.699	0.00000	0.00000	60.0
C05	SYBR	Unkn-03	F15H11ext	53-5	20.34	20.31	0.047	0.00000	-12.704	0.00000	0.00000	60.0
D03	SYBR	Unkn-04	F15H11ext	53-6	19.69	19.71	0.017	0.00000	-12.531	0.00000	0.00000	60.0
D04	SYBR	Unkn-04	F15H11ext	53-6	19.71	19.71	0.017	0.00000	-12.537	0.00000	0.00000	60.0
D05	SYBR	Unkn-04	F15H11ext	53-6	19.72	19.71	0.017	0.00000	-12.540	0.00000	0.00000	60.0
E03	SYBR	Unkn-05	F15H11ext	53-7	19.52	19.54	0.125	0.00000	-12.486	0.00000	0.00000	60.0
E04	SYBR	Unkn-05	F15H11ext	53-7	19.43	19.54	0.125	0.00000	-12.463	0.00000	0.00000	60.0
E05	SYBR	Unkn-05	F15H11ext	53-7	19.67	19.54	0.125	0.00000	-12.527	0.00000	0.00000	60.0
F03	SYBR	Unkn-06	F15H11ext	53-8	19.43	19.42	0.040	0.00000	-12.464	0.00000	0.00000	60.0
F04	SYBR	Unkn-06	F15H11ext	53-8	19.38	19.42	0.040	0.00000	-12.450	0.00000	0.00000	60.0
F05	SYBR	Unkn-06	F15H11ext	53-8	19.45	19.42	0.040	0.00000	-12.470	0.00000	0.00000	60.0
G03	SYBR	Unkn-07	F15H11ext	53-9	19.66	19.69	0.030	0.00000	-12.524	0.00000	0.00000	60.0
G04	SYBR	Unkn-07	F15H11ext	53-9	19.70	19.69	0.030	0.00000	-12.535	0.00000	0.00000	60.0
G05	SYBR	Unkn-07	F15H11ext	53-9	19.72	19.69	0.030	0.00000	-12.539	0.00000	0.00000	60.0
H03	SYBR	Unkn-08	F15H11ext	53-10	19.64	19.64	0.084	0.00000	-12.518	0.00000	0.00000	60.0
H04	SYBR	Unkn-08	F15H11ext	53-10	19.56	19.64	0.084	0.00000	-12.497	0.00000	0.00000	60.0
H05	SYBR	Unkn-08	F15H11ext	53-10	19.73	19.64	0.084	0.00000	-12.541	0.00000	0.00000	60.0
A06	SYBR	Unkn-09	F15H11ext	53-11	20.04	19.61	0.664	0.00000	-12.624	0.00000	0.00000	60.0
A07	SYBR	Unkn-09	F15H11ext	53-11	19.94	19.61	0.664	0.00000	-12.598	0.00000	0.00000	60.0
A08	SYBR	Unkn-09	F15H11ext	53-11	18.84	19.61	0.664	0.00000	-12.310	0.00000	0.00000	60.0
B06	SYBR	Unkn-10	F15H11ext	53-12	20.16	20.13	0.029	0.00000	-12.655	0.00000	0.00000	60.0
B07	SYBR	Unkn-10	F15H11ext	53-12	20.11	20.13	0.029	0.00000	-12.641	0.00000	0.00000	60.0
B08	SYBR	Unkn-10	F15H11ext	53-12	20.11	20.13	0.029	0.00000	-12.643	0.00000	0.00000	60.0
C06	SYBR	Unkn-11	F15H11ext	53-13	20.50	20.42	0.081	0.00000	-12.744	0.00000	0.00000	60.0
C07	SYBR	Unkn-11	F15H11ext	53-13	20.41	20.42	0.081	0.00000	-12.721	0.00000	0.00000	60.0
C08	SYBR	Unkn-11	F15H11ext	53-13	20.34	20.42	0.081	0.00000	-12.701	0.00000	0.00000	60.0
E06	SYBR	Unkn-13	F15H11ext	54-4	19.86	19.82	0.057	0.00000	-12.576	0.00000	0.00000	60.0
E07	SYBR	Unkn-13	F15H11ext	54-4	19.75	19.82	0.057	0.00000	-12.548	0.00000	0.00000	60.0
E08	SYBR	Unkn-13	F15H11ext	54-4	19.85	19.82	0.057	0.00000	-12.573	0.00000	0.00000	60.0
F06	SYBR	Unkn-14	F15H11ext	54-5	20.13	20.16	0.064	0.00000	-12.646	0.00000	0.00000	60.0
F07	SYBR	Unkn-14	F15H11ext	54-5	20.11	20.16	0.064	0.00000	-12.643	0.00000	0.00000	60.0
F08	SYBR	Unkn-14	F15H11ext	54-5	20.23	20.16	0.064	0.00000	-12.673	0.00000	0.00000	60.0
G06	SYBR	Unkn-15	F15H11ext	54-6	19.95	20.00	0.054	0.00000	-12.601	0.00000	0.00000	60.0
G07	SYBR	Unkn-15	F15H11ext	54-6	20.06	20.00	0.054	0.00000	-12.628	0.00000	0.00000	60.0
G08	SYBR	Unkn-15	F15H11ext	54-6	19.98	20.00	0.054	0.00000	-12.608	0.00000	0.00000	60.0
H06	SYBR	Unkn-16	F15H11ext	54-7	20.13	20.12	0.076	0.00000	-12.648	0.00000	0.00000	60.0
H07	SYBR	Unkn-16	F15H11ext	54-7	20.19	20.12	0.076	0.00000	-12.664	0.00000	0.00000	60.0
H08	SYBR	Unkn-16	F15H11ext	54-7	20.04	20.12	0.076	0.00000	-12.624	0.00000	0.00000	60.0
A09	SYBR	Unkn-17	F15H11ext	54-8	20.82	20.72	0.114	0.00000	-12.828	0.00000	0.00000	60.0
A10	SYBR	Unkn-17	F15H11ext	54-8	20.76	20.72	0.114	0.00000	-12.812	0.00000	0.00000	60.0
A11	SYBR	Unkn-17	F15H11ext	54-8	20.60	20.72	0.114	0.00000	-12.770	0.00000	0.00000	60.0
B09	SYBR	Unkn-18	F15H11ext	54-9	20.14	20.10	0.052	0.00000	-12.651	0.00000	0.00000	60.0
B10	SYBR	Unkn-18	F15H11ext	54-9	20.12	20.10	0.052	0.00000	-12.644	0.00000	0.00000	60.0
B11	SYBR	Unkn-18	F15H11ext	54-9	20.04	20.10	0.052	0.00000	-12.624	0.00000	0.00000	60.0
C09	SYBR	Unkn-19	F15H11ext	54-10	20.35	20.30	0.050	0.00000	-12.706	0.00000	0.00000	60.0
C10	SYBR	Unkn-19	F15H11ext	54-10	20.29	20.30	0.050	0.00000	-12.690	0.00000	0.00000	60.0
C11	SYBR	Unkn-19	F15H11ext	54-10	20.25	20.30	0.050	0.00000	-12.679	0.00000	0.00000
F15H11int
Well	Fluor	Contente	Target	Sample	Threshold cycle C(t)	C(t) Mean	C(t) Std Dev	Starting Quantity (SQ)	Log Starting Quantity	SQ Mean	SQ Std Dev.
B12	SYBR	NTC	F15H11int		N/A	0.00	0.000	N/A	N/A	0.00000	0.00000
A12	SYBR	NTC	F15H11int		N/A	0.00	0.000	N/A	N/A	0.00000	0.00000
A01	SYBR	Std	F15H11int		11.04	11.04	0.000	0.00000	-10.301	0.00000	0.00000
A02	SYBR	Std	F15H11int		10.62	10.62	0.000	0.00000	-10.301	0.00000	0.00000
B01	SYBR	Std	F15H11int		14.23	14.23	0.000	0.00000	-11.301	0.00000	0.00000
B02	SYBR	Std	F15H11int		14.42	14.42	0.000	0.00000	-11.301	0.00000	0.00000
C01	SYBR	Std	F15H11int		17.75	17.75	0.000	0.00000	-12.301	0.00000	0.00000
C02	SYBR	Std	F15H11int		17.73	17.73	0.000	0.00000	-12.301	0.00000	0.00000
D01	SYBR	Std	F15H11int		21.00	21.00	0.000	0.00000	-13.301	0.00000	0.00000
D02	SYBR	Std	F15H11int		21.24	21.24	0.000	0.00000	-13.301	0.00000	0.00000
E01	SYBR	Std	F15H11int		24.85	24.85	0.000	0.00000	-14.301	0.00000	0.00000
E02	SYBR	Std	F15H11int		25.10	25.10	0.000	0.00000	-14.301	0.00000	0.00000
F01	SYBR	Std	F15H11int		28.25	28.25	0.000	0.00000	-15.301	0.00000	0.00000
F02	SYBR	Std	F15H11int		29.11	29.11	0.000	0.00000	-15.301	0.00000	0.00000
G01	SYBR	Std	F15H11int		32.74	32.74	0.000	0.00000	-16.301	0.00000	0.00000
G02	SYBR	Std	F15H11int		32.61	32.61	0.000	0.00000	-16.301	0.00000	0.00000
H01	SYBR	Std	F15H11int		35.47	35.47	0.000	0.00000	-17.301	0.00000	0.00000
H02	SYBR	Std	F15H11int		35.57	35.57	0.000	0.00000	-17.301	0.00000	0.00000
A03	SYBR	Unkn-01	F15H11int	53-1	N/A	0.00	0.000	N/A	N/A	0.00000	0.00000
A04	SYBR	Unkn-01	F15H11int		N/A	0.00	0.000	N/A	N/A	0.00000	0.00000
A05	SYBR	Unkn-01	F15H11int		N/A	0.00	0.000	N/A	N/A	0.00000	0.00000
B03	SYBR	Unkn-02	F15H11int	53-4	35.11	35.21	0.308	0.00000	-17.113	0.00000	0.00000
B04	SYBR	Unkn-02	F15H11int		35.56	35.21	0.308	0.00000	-17.239	0.00000	0.00000
B05	SYBR	Unkn-02	F15H11int		34.97	35.21	0.308	0.00000	-17.075	0.00000	0.00000
C03	SYBR	Unkn-03	F15H11int	53-5	37.07	37.34	1.120	0.00000	-17.661	0.00000	0.00000
C04	SYBR	Unkn-03	F15H11int		36.37	37.34	1.120	0.00000	-17.465	0.00000	0.00000
C05	SYBR	Unkn-03	F15H11int		38.57	37.34	1.120	0.00000	-18.077	0.00000	0.00000
D03	SYBR	Unkn-04	F15H11int	53-6	N/A	0.00	0.000	N/A	N/A	0.00000	0.00000
D04	SYBR	Unkn-04	F15H11int		N/A	0.00	0.000	N/A	N/A	0.00000	0.00000
D05	SYBR	Unkn-04	F15H11int		N/A	0.00	0.000	N/A	N/A	0.00000	0.00000
E03	SYBR	Unkn-05	F15H11int	53-7	N/A	0.00	0.000	N/A	N/A	0.00000	0.00000
E04	SYBR	Unkn-05	F15H11int		N/A	0.00	0.000	N/A	N/A	0.00000	0.00000
E05	SYBR	Unkn-05	F15H11int		N/A	0.00	0.000	N/A	N/A	0.00000	0.00000
F03	SYBR	Unkn-06	F15H11int	53-8	34.84	35.28	0.535	0.00000	-17.038	0.00000	0.00000
F04	SYBR	Unkn-06	F15H11int		35.12	35.28	0.535	0.00000	-17.115	0.00000	0.00000
F05	SYBR	Unkn-06	F15H11int		35.87	35.28	0.535	0.00000	-17.326	0.00000	0.00000
G03	SYBR	Unkn-07	F15H11int	53-9	35.14	34.95	0.402	0.00000	-17.122	0.00000	0.00000
G04	SYBR	Unkn-07	F15H11int		34.49	34.95	0.402	0.00000	-16.940	0.00000	0.00000
G05	SYBR	Unkn-07	F15H11int		35.22	34.95	0.402	0.00000	-17.144	0.00000	0.00000
H03	SYBR	Unkn-08	F15H11int	53-10	33.32	32.90	0.376	0.00000	-16.614	0.00000	0.00000
H04	SYBR	Unkn-08	F15H11int		32.59	32.90	0.376	0.00000	-16.411	0.00000	0.00000
H05	SYBR	Unkn-08	F15H11int		32.79	32.90	0.376	0.00000	-16.466	0.00000	0.00000
A06	SYBR	Unkn-09	F15H11int	53-11	36.69	36.89	0.172	0.00000	-17.554	0.00000	0.00000
A07	SYBR	Unkn-09	F15H11int		37.01	36.89	0.172	0.00000	-17.643	0.00000	0.00000
A08	SYBR	Unkn-09	F15H11int		36.96	36.89	0.172	0.00000	-17.630	0.00000	0.00000
B06	SYBR	Unkn-10	F15H11int	53-12	37.31	37.94	1.118	0.00000	-17.725	0.00000	0.00000
B07	SYBR	Unkn-10	F15H11int		37.28	37.94	1.118	0.00000	-17.718	0.00000	0.00000
B08	SYBR	Unkn-10	F15H11int		39.23	37.94	1.118	0.00000	-18.262	0.00000	0.00000
C06	SYBR	Unkn-11	F15H11int	53-13	34.42	35.93	2.145	0.00000	-16.920	0.00000	0.00000
C07	SYBR	Unkn-11	F15H11int		N/A	0.00	0.000	N/A	N/A	0.00000	0.00000
C08	SYBR	Unkn-11	F15H11int		37.45	35.93	2.145	0.00000	-17.765	0.00000	0.00000
D06	SYBR	Unkn-12	F15H11int	54-1	N/A	0.00	0.000	N/A	N/A	0.00000	0.00000
D07	SYBR	Unkn-12	F15H11int		N/A	0.00	0.000	N/A	N/A	0.00000	0.00000
D08	SYBR	Unkn-12	F15H11int		N/A	0.00	0.000	N/A	N/A	0.00000	0.00000
E06	SYBR	Unkn-13	F15H11int	54-4	N/A	0.00	0.000	N/A	N/A	0.00000	0.00000
E07	SYBR	Unkn-13	F15H11int		37.05	36.97	0.122	0.00000	-17.655	0.00000	0.00000
E08	SYBR	Unkn-13	F15H11int		36.88	36.97	0.122	0.00000	-17.607	0.00000	0.00000
F06	SYBR	Unkn-14	F15H11int	54-5	N/A	0.00	0.000	N/A	N/A	0.00000	0.00000
F07	SYBR	Unkn-14	F15H11int		35.49	37.36	2.636	0.00000	-17.220	0.00000	0.00000
F08	SYBR	Unkn-14	F15H11int		39.22	37.36	2.636	0.00000	-18.260	0.00000	0.00000
G06	SYBR	Unkn-15	F15H11int	54-6	34.47	34.94	0.423	0.00000	-16.936	0.00000	0.00000
G07	SYBR	Unkn-15	F15H11int		35.03	34.94	0.423	0.00000	-17.091	0.00000	0.00000
G08	SYBR	Unkn-15	F15H11int		35.30	34.94	0.423	0.00000	-17.167	0.00000	0.00000
H06	SYBR	Unkn-16	F15H11int	54-7	N/A	0.00	0.000	N/A	N/A	0.00000	0.00000
H07	SYBR	Unkn-16	F15H11int		38.34	38.34	0.000	0.00000	-18.012	0.00000	0.00000
H08	SYBR	Unkn-16	F15H11int		N/A	0.00	0.000	N/A	N/A	0.00000	0.00000
A09	SYBR	Unkn-17	F15H11int	54-8	33.49	32.95	0.722	0.00000	-16.663	0.00000	0.00000
A10	SYBR	Unkn-17	F15H11int		32.13	32.95	0.722	0.00000	-16.283	0.00000	0.00000
A11	SYBR	Unkn-17	F15H11int		33.23	32.95	0.722	0.00000	-16.588	0.00000	0.00000
B09	SYBR	Unkn-18	F15H11int	54-9	N/A	0.00	0.000	N/A	N/A	0.00000	0.00000
B10	SYBR	Unkn-18	F15H11int		N/A	0.00	0.000	N/A	N/A	0.00000	0.00000
B11	SYBR	Unkn-18	F15H11int		37.56	37.56	0.000	0.00000	-17.797	0.00000	0.00000
C09	SYBR	Unkn-19	F15H11int	54-10	38.61	39.07	0.646	0.00000	-18.090	0.00000	0.00000
C10	SYBR	Unkn-19	F15H11int		39.53	39.07	0.646	0.00000	-18.344	0.00000	0.00000
C11	SYBR	Unkn-19	F15H11int		N/A	0.00	0.000	N/A	N/A	0.00000	0.00000
